# Supplementary material
Source: Springer Nature journal article supplement (https://www.springermedizin.de/resource/supplementary/12889_2010_2560_MOESM2_ESM.pdf/9486444)

## Uw gewicht nu en in de toekomst

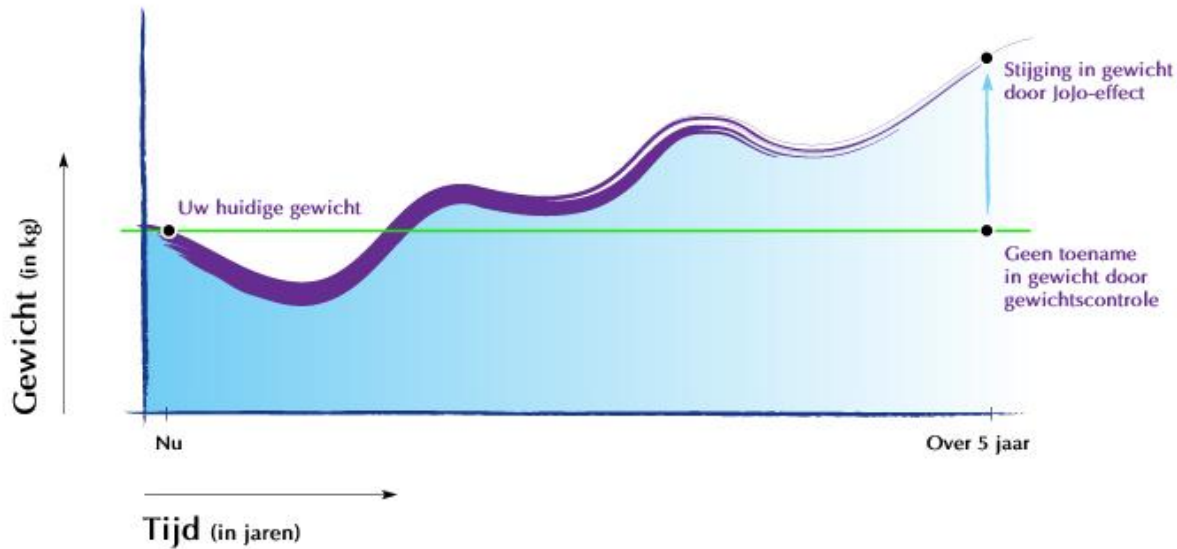

Supplement: MOESM2 [file 9486444]
